# Supplementary material for: Identification of a Novel Inflamed Tumor Microenvironment Signature as a Predictive Biomarker of Bacillus Calmette-Guérin Immunotherapy in Non–Muscle-Invasive Bladder Cancer
Source: PubMed Central journal article supplement — Clin Cancer Res. 2021 Jun 11;27(16):4599–609. doi: 10.1158/1078-0432.CCR-21-0205 (PMC8416390; doi:10.1158/1078-0432.ccr-21-0205), 2021-06-11
Supplement: NIHMS1715684-supplement-5.pdf [file NIHMS1715684-supplement-5.pdf]

### Immune Score

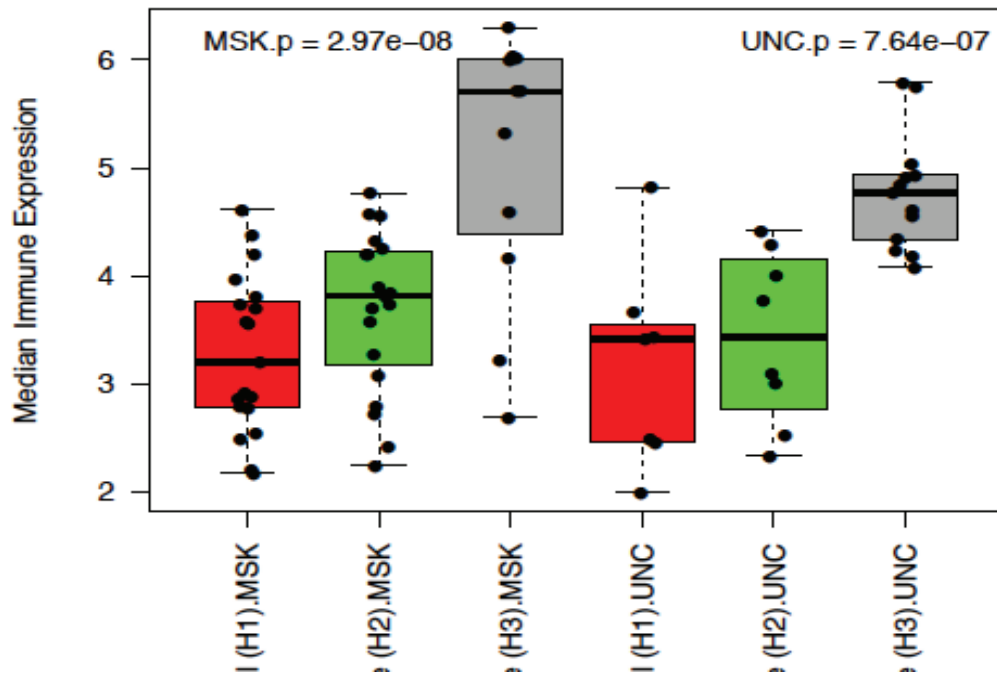

**Supplemental Figure 4:**  
**Immune Signature score by Patient Cohort and UROMOL subtype**
