# Supplementary material for: Identification of a Novel Inflamed Tumor Microenvironment Signature as a Predictive Biomarker of Bacillus Calmette-Guérin Immunotherapy in Non–Muscle-Invasive Bladder Cancer
Source: PubMed Central journal article supplement — Clin Cancer Res. 2021 Jun 11;27(16):4599–609. doi: 10.1158/1078-0432.CCR-21-0205 (PMC8416390; doi:10.1158/1078-0432.ccr-21-0205), 2021-06-11
Supplement: NIHMS1715684-supplement-10.pdf [file NIHMS1715684-supplement-10.pdf]

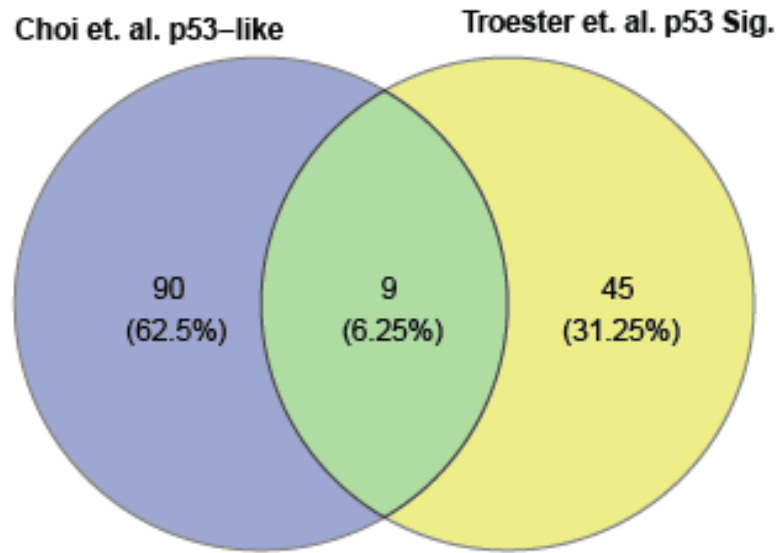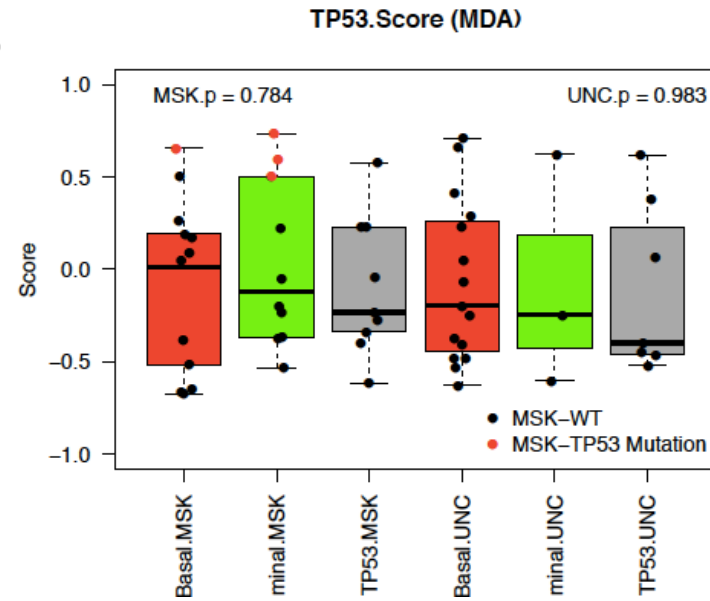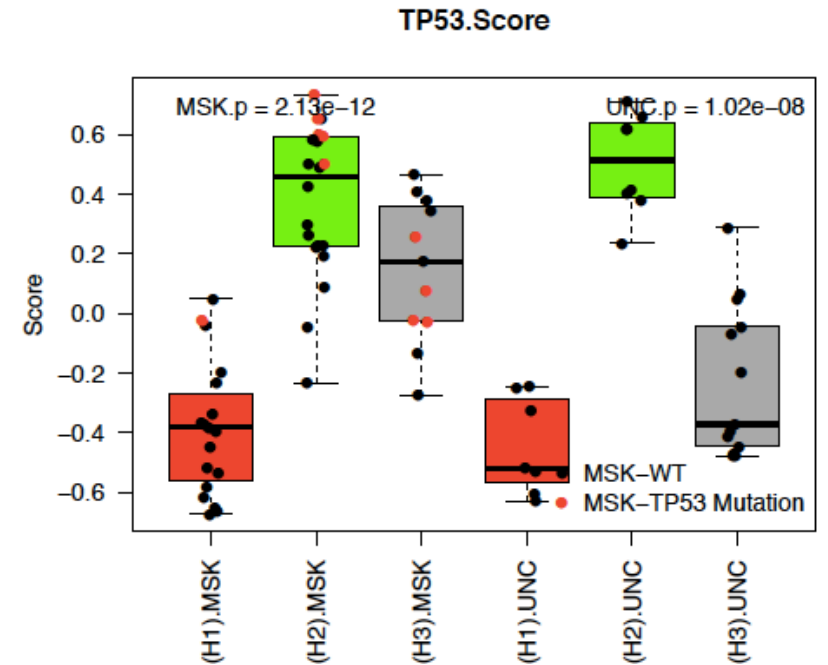

Supplemental Figure 9A: Venn Diagram demonstrating overlap between “p53-associated” signature from Troester et al. vs. “p53-like” signature from Choi et al;

9B: “p53-like” signature from Choi et (MDA) *by UROMOL Subclasses in MSK and UNC cohorts*

9C: “p53-associated” signature from Troester et al. *by UROMOL Subclasses in MSK and UNC cohorts*
