# Supplementary material for: Identification of a Novel Inflamed Tumor Microenvironment Signature as a Predictive Biomarker of Bacillus Calmette-Guérin Immunotherapy in Non–Muscle-Invasive Bladder Cancer
Source: PubMed Central journal article supplement — Clin Cancer Res. 2021 Jun 11;27(16):4599–609. doi: 10.1158/1078-0432.CCR-21-0205 (PMC8416390; doi:10.1158/1078-0432.ccr-21-0205), 2021-06-11
Supplement: NIHMS1715684-supplement-11.pdf [file NIHMS1715684-supplement-11.pdf]

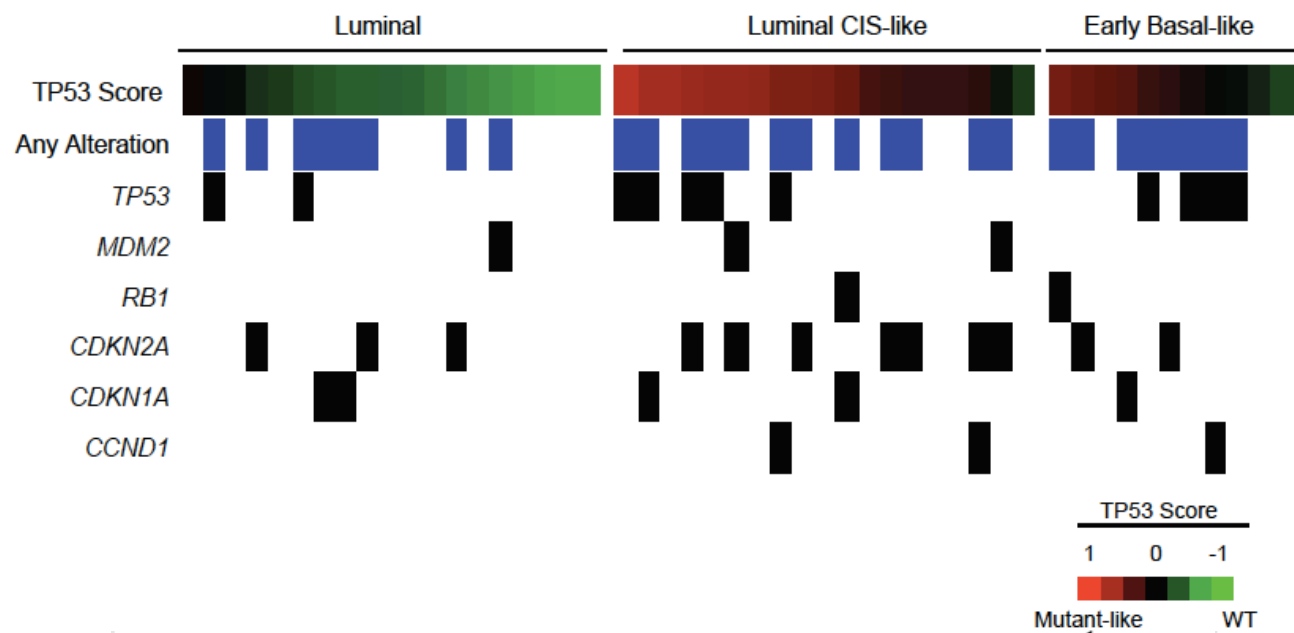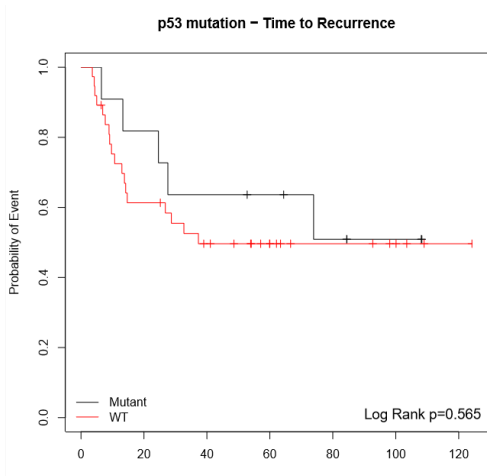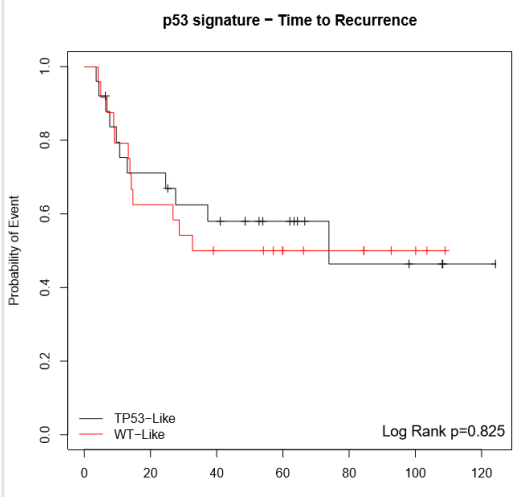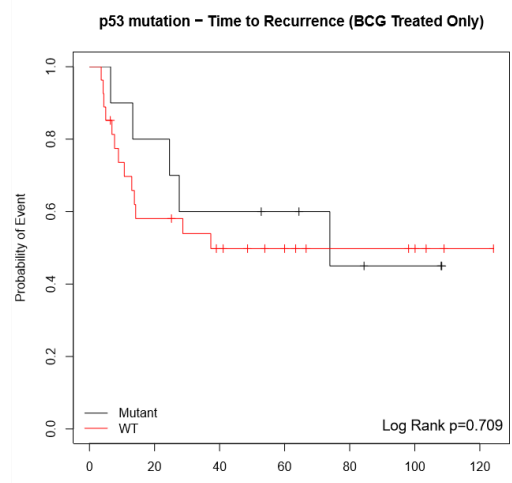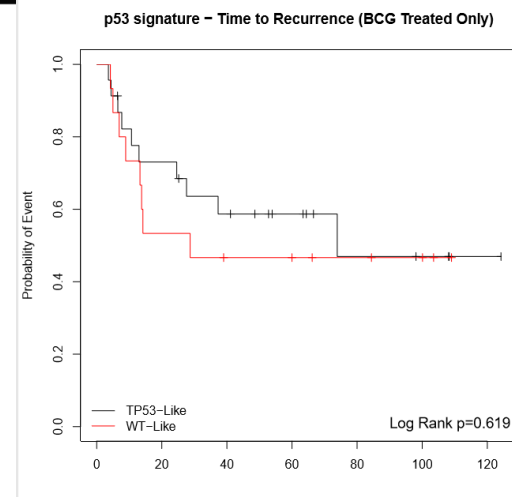

**Supplemental Figure 10: Comparison of DNA based alterations in TP53 and other cell cycle regulation genes compared to “p53-associated” signature from Troester et al. (TP53 score). Association between RFS with TP53 Mutation (DNA) & p53 RNA signature**
