# Supplementary figures and images for: Identification of a Novel Inflamed Tumor Microenvironment Signature as a Predictive Biomarker of Bacillus Calmette-Guérin Immunotherapy in Non–Muscle-Invasive Bladder Cancer
Source: PubMed Central journal article supplement — Clin Cancer Res. 2021 Jun 11;27(16):4599–609. doi: 10.1158/1078-0432.CCR-21-0205 (PMC8416390; doi:10.1158/1078-0432.ccr-21-0205), 2021-06-11

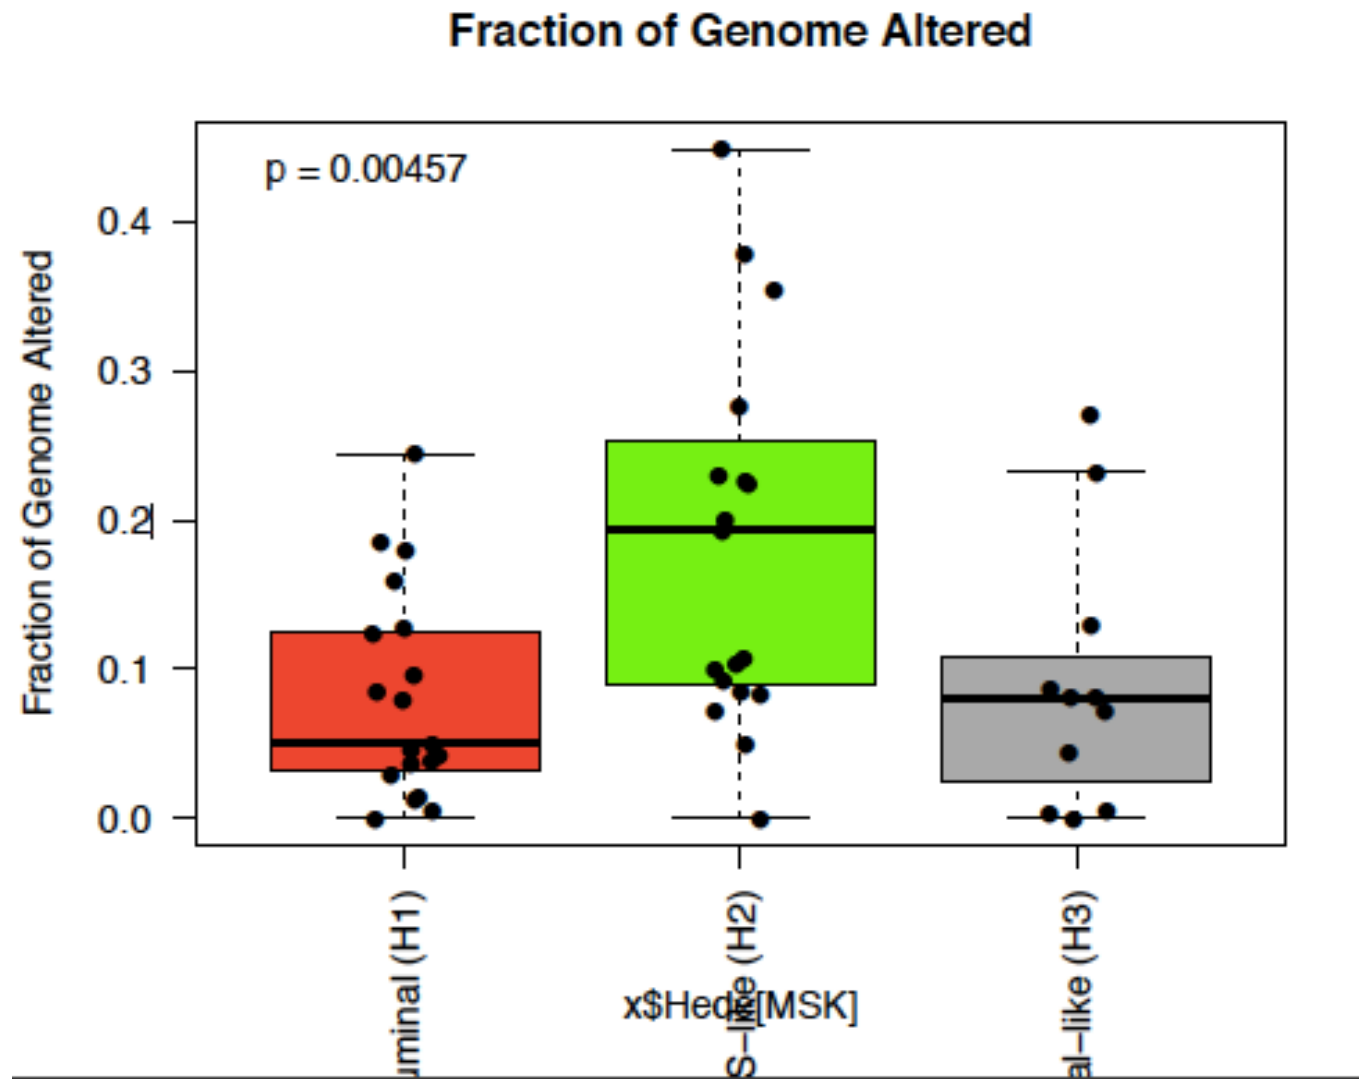

Supplemental Figure 8: Bar graph of Fraction of Genome Altered by UROMOL subgroups

Supplement: NIHMS1715684-supplement-9.pdf [file NIHMS1715684-supplement-9.pdf]
